# Supplementary material
Source: publisher figshare collection journal article supplement (https://gsapubs.figshare.com/ndownloader/files/24850538)
Supplement: Supplementary file 1 [file 24850538]

## Sheet: Sheet1
Supplemental Material for Ashworth, A.C., Thackray, G.D., and Gavin, D.G., 2020, Climate of the Last Glacial Maximum on the western Olympic Peninsula
based on insect paleoecology, palynology, and glacial geology, in Waitt, R.B., Thackray, G.D., and Gillespie, A.R., eds., Untangling the Quaternary Period:
A Legacy of Stephen C. Porter: Geological Society of America Special Paper 548, https://doi.org/10.1130/2020.2548(06).
S2D. Kalaloch K3
TAXA	H	P	LE	RE	Other	MNI
Carabidae
Trechus chalybeus	1	2				2
Trechus sp.	1		4	4		4
Bembidion sp.			1
Carabidae gen.sp.				4	E	4
Hydrophilidae
Helophorus auricollis		1	1	5		5
Helophorus sp.	1	4	6	5		6
cf. Hydrophilidae gen. sp.			1
Staphylinidae
Arpedium cribratum	1	3				3
Arpedium sp.			7	8		8
Olophrum consimile			1	1		1
Aleocharinae gen. spp.		32	1			32
Quedius sp.		2		1		2
Philonthus sp		1
Staphylininae gen. sp.	1	1		1		1
Staphylinidae gen. sp.			1			1
Scarabaeidae
Aegialia opaca	3	8	4	4		8
Aphodiini gen. sp.			1			1
Byrrhidae
Cytilus sp.		1				1
Elateridae
Hypnoidus sp.		1		1		1
Sericus incongruus		1				1
Chrysomelidae
Neocrepidodera sp.			1			1
Chrysomelidae gen. sp.			1			1
Brentidae
Apion spp.	1		2	2		2
Curculionidae
Erirhinus aethiops	1		2			2
Entiminae gen. sp.	2					2
Curculionidae gen. sp.			1			1
Hymenoptera					1m	1
Total individules						91
H=head(s); P=pronotum(a); LE= left elytron (a); RE=right elytron (a);S=sternite (s);
E=elyrton indeterminate; f=fragment; MNI=minimum number of individuals
